# Supplementary material for: Acetylation of Scaled-Down Chitin Nanofiber Films to Improve Mechanical Properties
Source: MDPI journal article supplement (doi:10.3390/surfaces6030017), 2023-07-27
Supplement: s1 [file s1]

## **Supporting Information**

# **Acetylation of Scaled-down Chitin Nanofiber Films to Improve Mechanical Properties**

Jun-ichi Kadokawa\*, Chiharu Iiyama, and Aoi Nakashima

Graduate School of Science and Engineering, Kagoshima University, 1-21-40 Korimoto,

Kagoshima 890-0065, Japan; k8959483@kadai.jp (C.I.); k4137897@kadai.jp (A.N.)

\* Correspondence: kadokawa@eng.kagoshima-u.ac.jp; Tel.: +81-99-285-7743

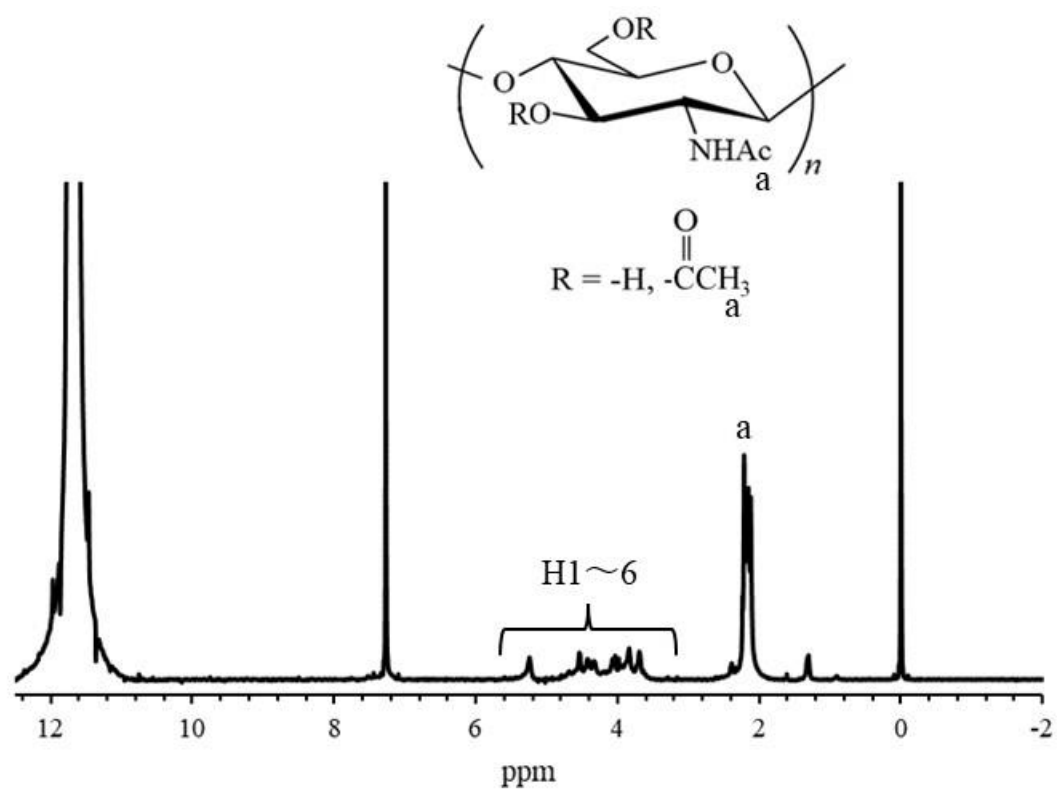

**Figure S1**  $^1\text{H}$  NMR spectrum of sample by acidic hydrolysis and dissolution of chitin acetate, prepared using acetic anhydride in 1-allyl-3-methylimidazolium bromide (AMIMBr), in  $\text{DCI}/\text{D}_2\text{O}$ .

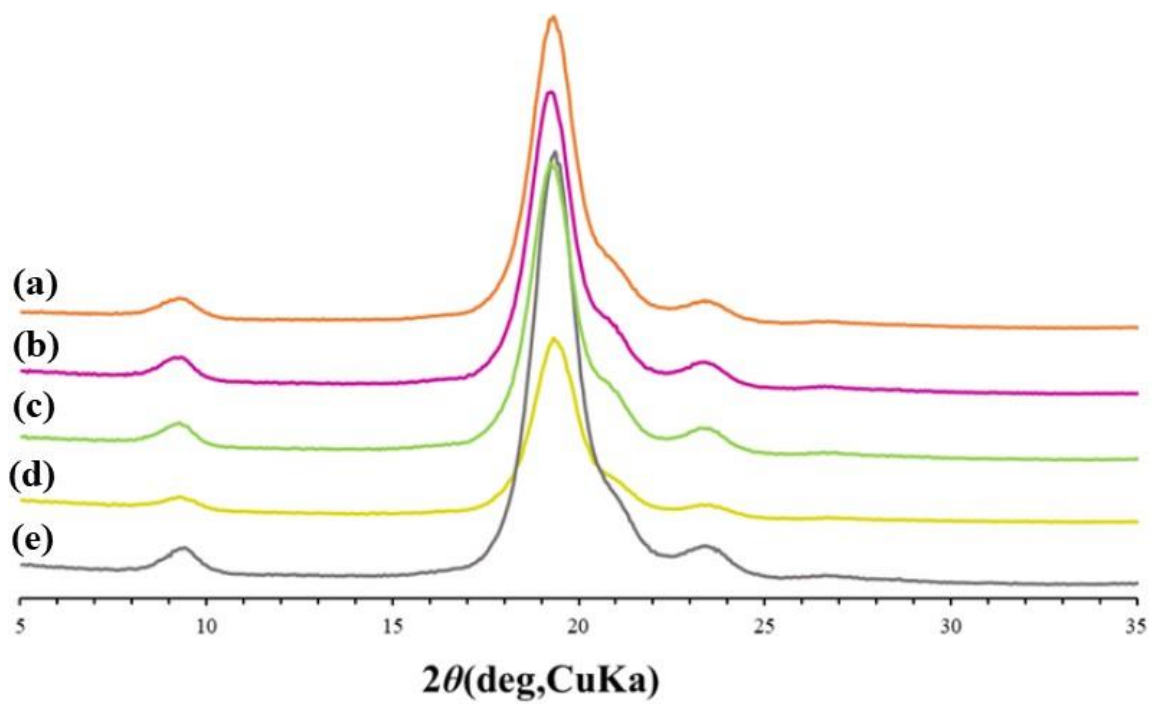

**Figure S2** XRD profiles of (a-d) acetylated SD-ChNF films of entries 1-4 and (e) SD-ChNF film.
